# Supplementary material for: Evolutionary analyses reveal independent origins of gene repertoires and structural motifs associated to fast inactivation in calcium-selective TRPV channels
Source: Springer Nature journal article supplement (doi:10.1038/s41598-020-65679-6), 2020-05-26
Supplement: 41598_2020_65679_MOESM2_ESM.pdf [file 41598_2020_65679_MOESM2_ESM.pdf]

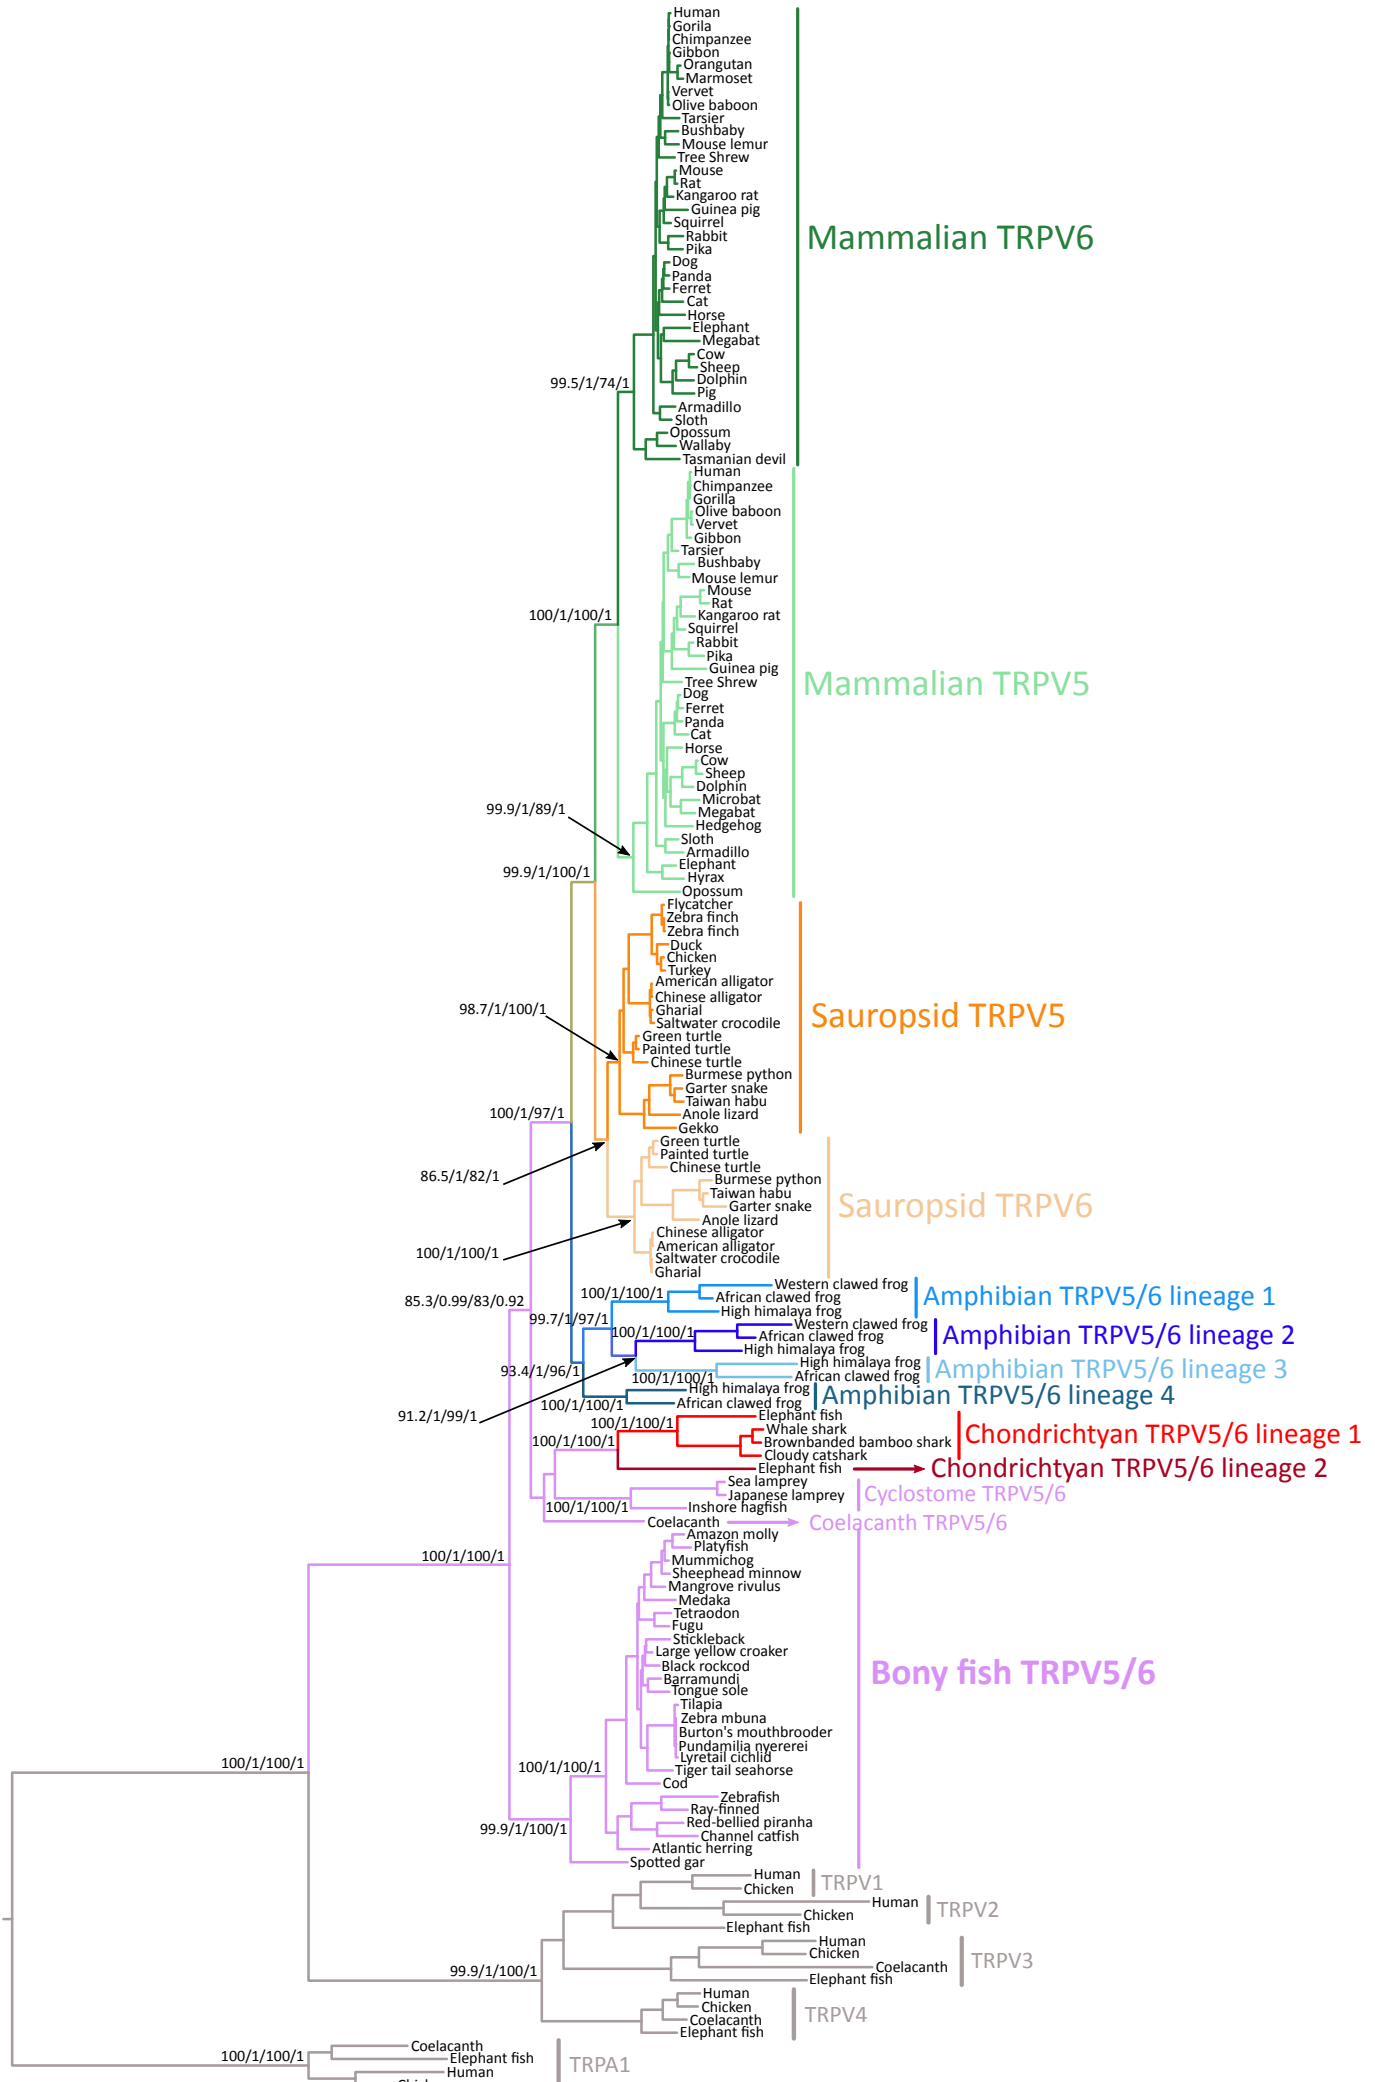

Mammalian TRPV6

Mammalian TRPV5

Sauropsid TRPV5

Sauropsid TRPV6

Amphibian TRPV5/6 lineage 1

Amphibian TRPV5/6 lineage 2

Amphibian TRPV5/6 lineage 3

Amphibian TRPV5/6 lineage 4

Chondrichthyan TRPV5/6 lineage 1

Chondrichthyan TRPV5/6 lineage 2

Cyclostome TRPV5/6

Bony fish TRPV5/6

TRPV1

TRPV2

TRPV3

TRPV4

TRPA1

0.6
