# Supplementary material for: Evolutionary analyses reveal independent origins of gene repertoires and structural motifs associated to fast inactivation in calcium-selective TRPV channels
Source: PubMed Central journal article supplement (PMC7250927; doi:10.1038/s41598-020-65679-6), 2020-05-26
Supplement: 41598_2020_65679_MOESM8_ESM.pdf [file 41598_2020_65679_MOESM8_ESM.pdf]

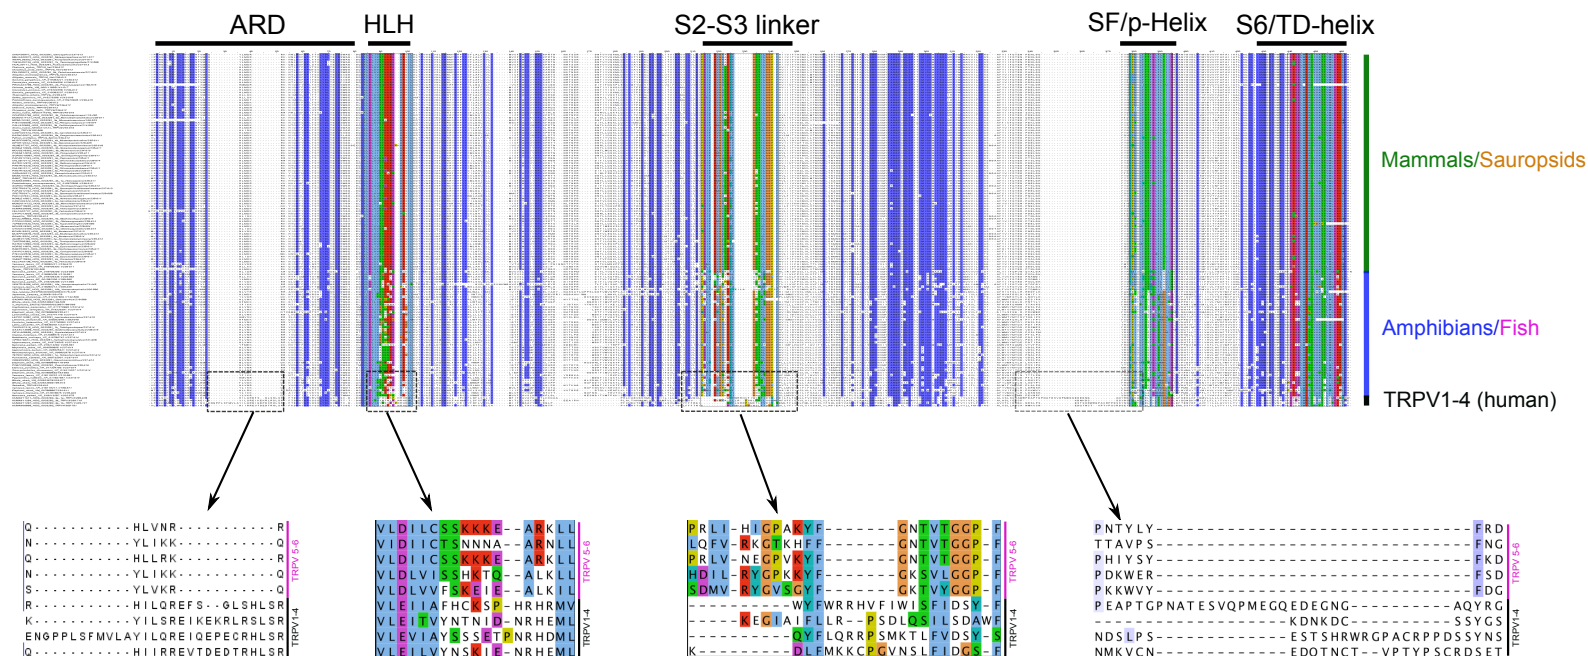

**Supplementary figure 1.** Amino acid sequence alignment of TRPV5 and TRPV6 channels. Human TRPV1-4 were used as outgroups. Species and genes are denoted to the left and amino acid numbers in the alignment at top. Insets show insertions introduced by TRPV1-4 sequences in the alignment. Relevant channel domains are highlighted on top:

ARD: Ankyrin Repeat Domain

HLH: Helix-Loop-Helix Domain

S2-S3 linker: Intracellular loop between transmembrane segments 2 and 3.

SF/p-Helix: Selectivity Filter & pore Helix

S6/TDhelix: Transmembrane Segment6 & TRP Domain Helix.
