# Supplementary material for: Evolutionary analyses reveal independent origins of gene repertoires and structural motifs associated to fast inactivation in calcium-selective TRPV channels
Source: Springer Nature journal article supplement (doi:10.1038/s41598-020-65679-6), 2020-05-26

**A**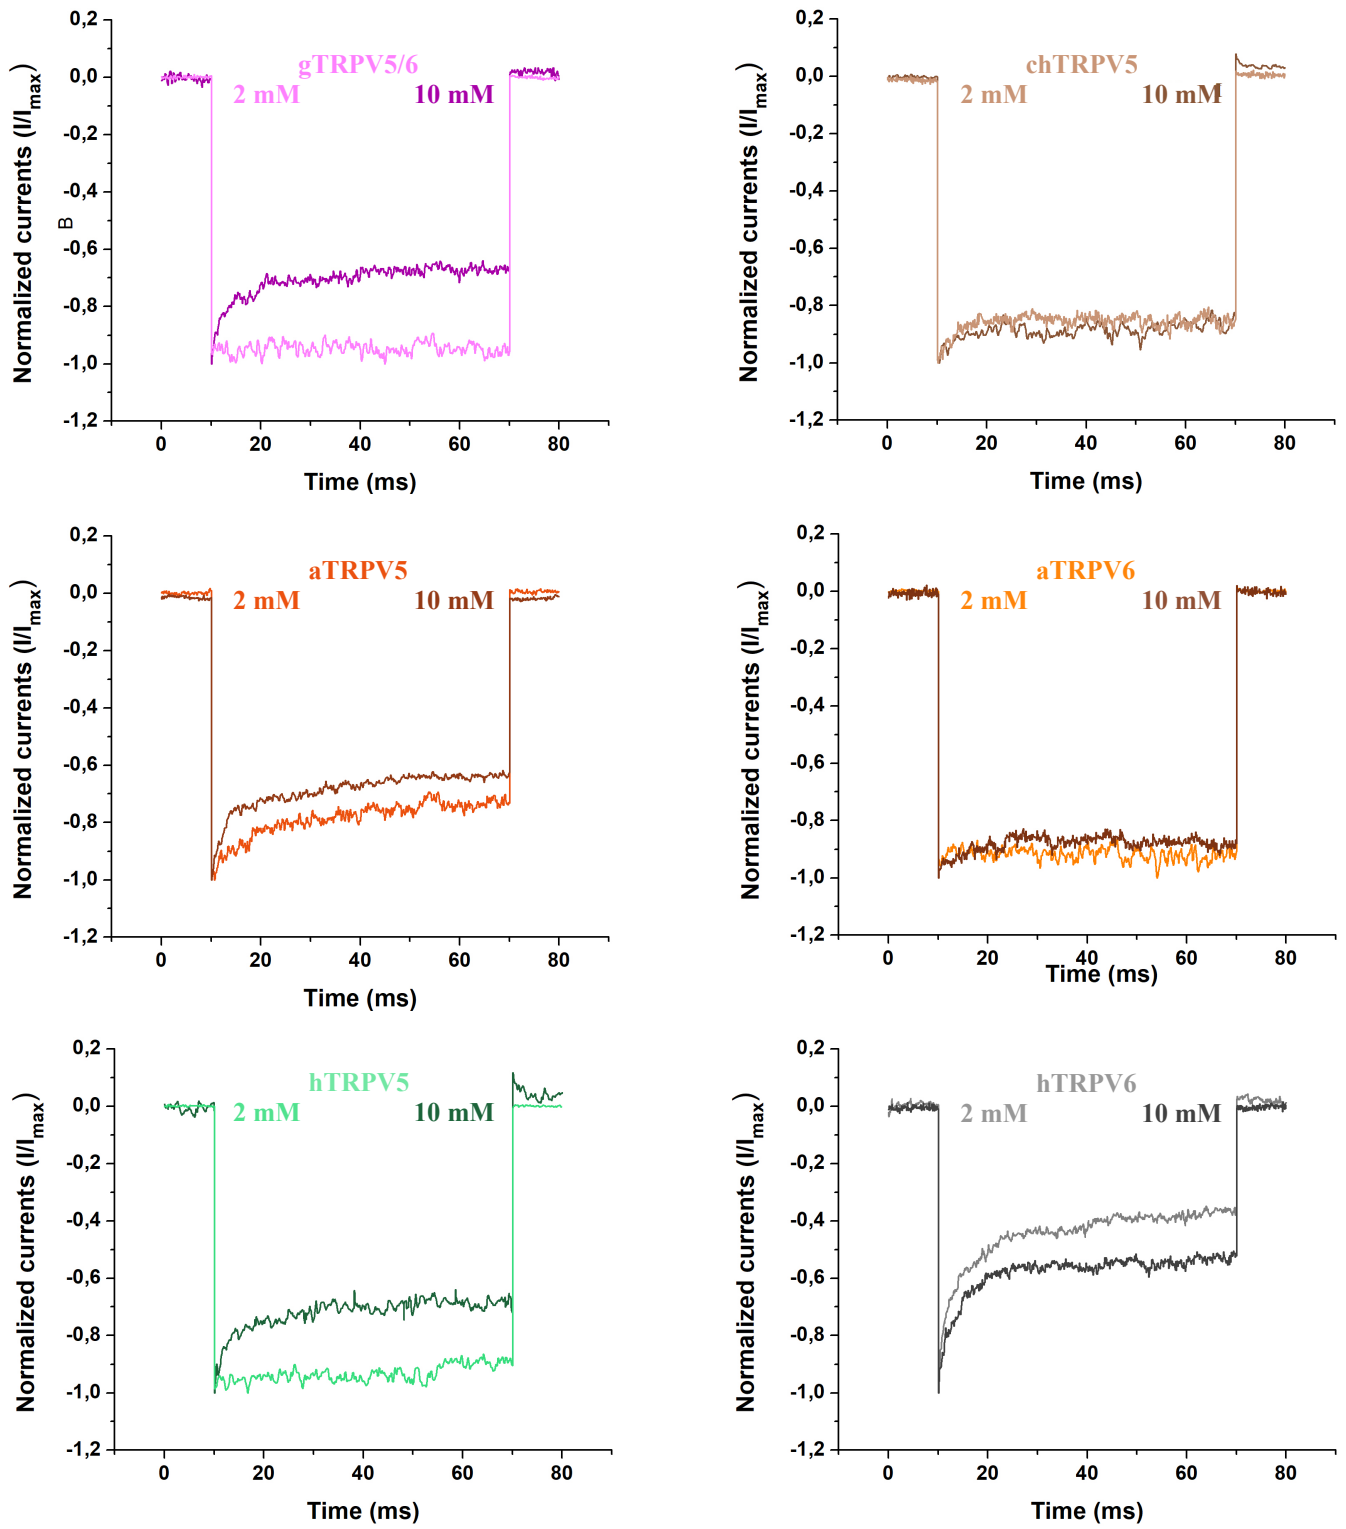**B**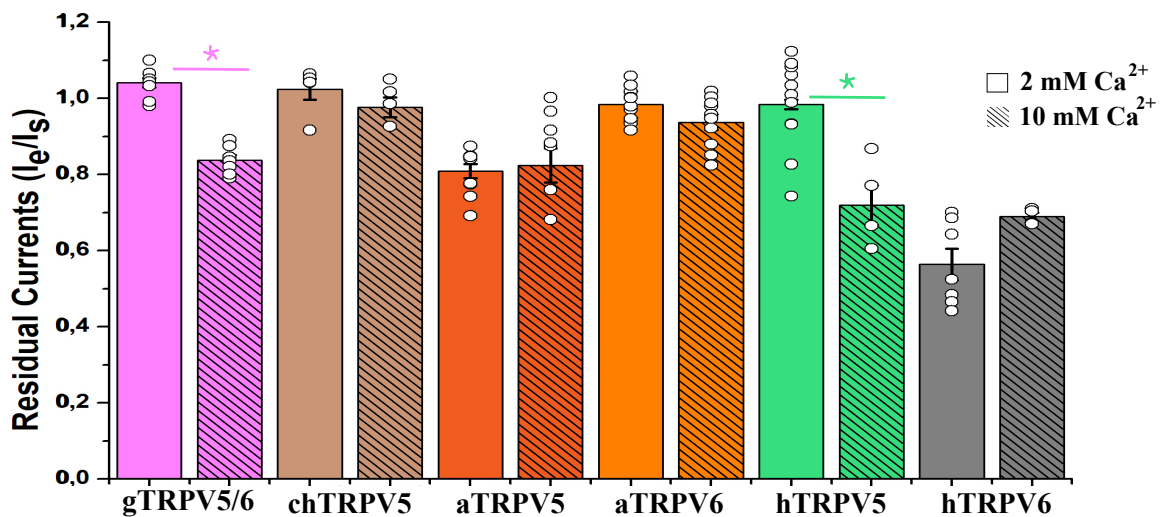

Supplement: 41598_2020_65679_MOESM12_ESM.pdf [file 41598_2020_65679_MOESM12_ESM.pdf]
